# Supplementary material
Source: PubMed Central journal article supplement (PMC7663810)
Supplement: NIHMS918458-supplement-dummy_label.pdf [file NIHMS918458-supplement-dummy_label.pdf]

Table S1. Baseline Neurocognitive Performance and Comparison Across Diagnostic Groups<sup>a</sup>, adjusted for

|                                    | <b>Statistics</b>     |                        |                        |          |           |              |                                           |
|------------------------------------|-----------------------|------------------------|------------------------|----------|-----------|--------------|-------------------------------------------|
|                                    | <b>HSC<br/>(n=89)</b> | <b>CHR<br/>(n=205)</b> | <b>EFEP<br/>(n=28)</b> | <b>F</b> | <b>df</b> | <b>P</b>     | <b>Post-Hoc<br/>Contrasts<sup>b</sup></b> |
| Processing Speed                   | -0.88<br>(1.59)       | -0.89<br>(1.55)        | -1.44<br>(1.73)        | 6.28     | 3, 375    | <b>0.006</b> | <b>CNTL&gt;<br/>EFEP</b>                  |
| Working Memory                     | -0.45<br>(1.62)       | -0.59<br>(1.82)        | -1.15<br>(2.12)        | 3.09     | 3, 391    | 0.08         | -                                         |
| Attention/Vigilance                | -1.01<br>(1.80)       | -1.08<br>(1.63)        | -1.12<br>(1.00)        | 3.22     | 3, 391    | 0.19         | -                                         |
| Verbal Learning                    | -0.06<br>(1.47)       | -0.12<br>(1.89)        | -1.17<br>(2.16)        | 4.60     | 3, 391    | <b>0.008</b> | <b>EFEP&lt;<br/>CNTL, HSC,<br/>CHR</b>    |
| Visual Learning                    | 0.13<br>(1.48)        | 0.33<br>(1.37)         | 0.08<br>(1.68)         | 2.46     | 3, 391    | 0.06         | -                                         |
| Reasoning and<br>Problem Solving   | -0.32<br>(1.98)       | -0.52<br>(1.92)        | -0.38<br>(1.04)        | 0.75     | 3, 391    | 0.71         | -                                         |
| Overall<br>Neurocomposite<br>Score | -0.44<br>(1.71)       | -0.48<br>(1.16)        | -0.87<br>(1.23)        | 3.96     | 3, 391    | <b>0.04</b>  | <b>CNTL<br/>&gt;EFEP</b>                  |

Note: HSC=Help Seeking Controls, CHR=Clinical High Risk group, CHR-T=CHR Converters, CHR-NT=CHR Non-Converters, EFEP=Early First Episode Patients

<sup>a</sup>Relative to the healthy comparison (CNTL) group (mean set to 0, SD set to 1).

<sup>b</sup>Bonferroni-corrected post hoc contrast (.05/5= $P < 0.01$ ).

Table S2. Baseline Neurocognitive Performance Across Diagnostic Groups<sup>a</sup>, including CHRs who Transition (CHR-T) versus Not Transition (CHR-NT) to Psychosis, adjusted for

|                               | <b>HSC<br/>(n=89)</b> | <b>CHR-NT<br/>(n=163)</b> | <b>CHR-T<br/>(n=12)</b> | <b>EFEP<br/>(n=28)</b> | <b>Statistics</b> |           |                    |                                                                      |
|-------------------------------|-----------------------|---------------------------|-------------------------|------------------------|-------------------|-----------|--------------------|----------------------------------------------------------------------|
|                               |                       |                           |                         |                        | <b>F</b>          | <b>df</b> | <b>P<br/>value</b> | <b>Post-Hoc Contrasts<sup>a</sup></b>                                |
| Processing Speed              | -0.88<br>(1.59)       | -0.80<br>(1.48)           | -1.40<br>(2.22)         | -1.45 (7.73)           | 5.31              | 4,<br>344 | <b>.005</b>        | <b>CNTL&gt; CHR-T, EFEP, HSC;<br/>EFEP&lt;CHR-NT</b>                 |
| Working Memory                | -0.45<br>(1.62)       | -0.45<br>(1.83)           | -1.45<br>(2.47)         | -1.15 (2.12)           | 3.71              | 4,<br>356 | <b>0.01</b>        | -                                                                    |
| Attention/Vigilance           | -1.01<br>(1.80)       | -0.99<br>(1.58)           | -1.23<br>(1.59)         | -1.12 (1.00)           | 3.27              | 4,<br>356 | <b>0.09</b>        | -                                                                    |
| Verbal Learning               | -0.06<br>(1.47)       | 0.02<br>(1.84)            | -1.63<br>(2.73)         | -1.17 (2.16)           | 6.46              | 4,<br>356 | <b>&lt;.001</b>    | <b>CNTL&gt;CHR-T,EFEP;<br/>CHR-T&lt;CHR-NT, HSC;<br/>HSC&gt;EFEP</b> |
| Visual Learning               | 0.13<br>(1.48)        | 0.37<br>(1.41)            | 0.01<br>(1.35)          | -0.08 (1.68)           | 2.27              | 4,<br>356 | 0.06               | -                                                                    |
| Reasoning and Problem Solving | -0.32<br>(1.98)       | -0.49<br>(1.98)           | -0.45<br>(1.65)         | -0.38 (1.04)           | 0.46              | 4,<br>356 | 0.90               | -                                                                    |
| Overall Neurocomposite Score  | -0.44<br>(1.71)       | -0.39<br>(1.14)           | -1.02<br>(1.64)         | -0.87<br>(1.23)        | 4.782             | 4,<br>356 | <b>0.003</b>       | <b>CNTL&gt;CHR-T, FE</b>                                             |

Note: HSC=Help Seeking Controls, CHR=Clinical High Risk group, CHR-T=CHR Converters, CHR-NT=CHR Non-Converters, EFEP=Early First Episode Patients

<sup>a</sup>Relative to the healthy comparison (CNTL) group (mean set to 0, SD set to 1).

<sup>b</sup>Bonferroni-corrected post hoc contrast (.05/6= $P$ <0.008).

Table S3. Effect sizes (Cohen’s d) Reflecting Diagnostic Group Differences in Cognitive Domains

|                               | CNTL<br>vs. |      |        |       |      | HSC<br>vs. |        |       |      | CHR-NT<br>vs. |      | CHR-T<br>vs. |
|-------------------------------|-------------|------|--------|-------|------|------------|--------|-------|------|---------------|------|--------------|
|                               | HSC         | CHR  | CHR-NT | CHR-T | EFEP | CHR        | CHR-NT | CHR-T | EFEP | CHR-T         | EFEP | EFEP         |
| Processing Speed              | 0.63        | 0.63 | 0.58   | 1.10  | 1.09 | 0.00       | 0.05   | 0.32  | 0.34 | 0.39          | 0.41 | 0.02         |
| Working Memory                | 0.32        | 0.35 | 0.27   | 1.08  | 0.67 | 0.08       | 0.00   | 0.56  | 0.30 | 0.53          | 0.29 | 0.20         |
| Attention/Vigilance           | 0.66        | 0.69 | 0.68   | 1.12  | 1.15 | 0.03       | 0.02   | 0.12  | 0.08 | 0.16          | 0.11 | 0.07         |
| Verbal Learning               | 0.05        | 0.07 | 0.01   | 1.12  | 0.72 | 0.03       | 0.05   | 0.92  | 0.62 | 0.86          | 0.60 | 0.20         |
| Visual Learning               | 0.10        | 0.25 | 0.28   | 0.01  | 0.06 | 0.14       | 0.16   | 0.08  | 0.13 | 0.25          | 0.30 | 0.05         |
| Reasoning and Problem Solving | 0.19        | 0.28 | 0.27   | 0.28  | 0.34 | 0.09       | 0.07   | 0.01  | 0.01 | 0.09          | 0.07 | 0.03         |
| Overall Neurocomposite Score  | 0.43        | 0.44 | 0.37   | 1.21  | 0.95 | 0.04       | 0.04   | 0.49  | 0.34 | 0.56          | 0.39 | 0.15         |

Note: HSC=Help Seeking Controls, CHR=Clinical High Risk group, CHR-T=CHR Converters, CHR-NT=CHR Non-Converters, EFEP=Early First Episode Patients

Table S4. Univariable Cox Proportional Hazard Models Predicting Transition to Psychosis (CHR-T vs. CHR-NT)

| <b>Predictor Variable</b>     | <b>B</b> | <b>SE</b> | <b>Wald</b> | <b>HR (95% CI)</b>  | <b>P Value</b> |
|-------------------------------|----------|-----------|-------------|---------------------|----------------|
| Processing Speed              | -.253    | .192      | 1.736       | 0.777 (0.534-1.131) | 0.188          |
| Working Memory                | -.221    | .110      | 4.042       | 0.802 (0.646-0.994) | <b>0.044</b>   |
| Attention/Vigilance           | -.102    | .180      | .319        | 0.903 (0.635-1.285) | 0.572          |
| Verbal Learning               | -.292    | .099      | 8.601       | 0.747 (0.615-0.908) | <b>0.003</b>   |
| Visual Learning               | -.141    | .178      | .627        | 0.868 (0.612-1.232) | 0.429          |
| Reasoning and Problem Solving | .029     | .193      | .022        | 1.029 (0.705-1.502) | 0.882          |
